# A sub-exponential branching process to study early epidemic dynamics with application to Ebola

Alexander E. Zarebski

*Department of Zoology, University of Oxford, Oxford OX1 3SZ, United Kingdom*

E-mail: alexander.zarebski@zoo.ox.ac.uk

Robert Moss

*Centre for Epidemiology and Biostatistics, Melbourne School of Population and Global Health, The University of Melbourne, Parkville 3052, Australia*

James M. McCaw

*School of Mathematics and Statistics, The University of Melbourne, Parkville 3052, Australia*

*Centre for Epidemiology and Biostatistics, Melbourne School of Population and Global Health, The University of Melbourne, Parkville 3052, Australia*

*Victorian Infectious Diseases Reference Laboratory Epidemiology Unit, Peter Doherty Institute for Infection and Immunity, The Royal Melbourne Hospital and The University of Melbourne, Melbourne 3000, Australia*

## 1 Abstract

2 Exponential growth is a mathematically convenient model for the early stages of an  
3 outbreak of an infectious disease. However, for many pathogens (such as Ebola virus)  
4 the initial rate of transmission may be sub-exponential, even before transmission is  
5 affected by depletion of susceptible individuals.

6 We present a stochastic multi-scale model capable of representing sub-exponential  
7 transmission: an in-homogeneous branching process extending the generalised growth  
8 model. To validate the model, we fit it to data from the Ebola epidemic in West Africa  
9 (2014–2016). We demonstrate how a branching process can be fit to both time series  
10 of confirmed cases and chains of infection derived from contact tracing. Our estimates  
11 of the parameters suggest transmission of Ebola virus was sub-exponential during this  
12 epidemic. Both the time series data and the chains of infections lead to consistent  
13 parameter estimates. Differences in the data sets meant consistent estimates were not a  
14 foregone conclusion. Finally, we use a simulation study to investigate the properties of  
15 our methodology. In particular, we examine the extent to which the estimates obtained  
16 from time series data and those obtained from chains of infection data agree.

17 Our method, based on a simple branching process, is well suited to real-time analy-  
18 sis of data collected during contact tracing. Identifying the characteristic early growth  
19 dynamics (exponential or sub-exponential), including an estimate of uncertainty, dur-  
20 ing the first phase of an epidemic should prove a useful tool for preliminary outbreak  
21 investigations.

## 22 Author Summary

23 Epidemic forecasts have the potential to support public health decision making in out-  
24 break scenarios for diseases such as Ebola and influenza. In particular, reliable pre-  
25 dictions of future incidence data may guide surveillance and intervention responses.  
26 Existing methods for producing forecasts, based upon mechanistic transmission models,  
27 often make an implicit assumption that growth is exponential, at least while susceptible  
28 depletion remains negligible. However, empirical studies suggest that many infectious  
29 disease outbreaks display sub-exponential growth early in the epidemic. Here we in-  
30 troduce a mechanistic model of early epidemic growth that allows for sub-exponential  
31 growth in incidence. We demonstrate how the model can be applied to the types of data  
32 that are typically available in (near) real-time, including time series data on incidence as  
33 well as individual-level case series and chains of transmission data. We apply our meth-  
34 ods to publically available data from the 2014–2016 West Africa Ebola epidemic and  
35 demonstrate that early epidemic growth was sub-exponential. We also investigate the  
36 statistical properties of our model through a simulation re-estimation study to identify  
37 its performance characteristics and avenues for further methodological research.

38 **Keywords:** Branching processes, Epidemic dynamics, Ebola virus disease, Bayesian  
39 statistics

## 40 1. Introduction

41 Physical systems can rarely support exponential growth for extended periods; during  
42 an epidemic, depletion of susceptible individuals leads to reduced transmission and, if  
43 intervention measures have not already done so, cause incidence to decline. Despite re-  
44 cent work showing the initial transmission of many diseases is sub-exponential, it is still  
45 common to see epidemics represented by models in which transmission grows exponen-  
46 tially Viboud et al. (2016). This is concerning because exponential growth is extremely  
47 sensitive to its growth rate parameter, which can inflate the variance of forecasts. During  
48 an outbreak of a novel pathogen, uncertainty in the growth rate is almost guaranteed.  
49 Furthermore, the likely impact of an intervention, such as social-distancing or deploy-  
50 ment of a vaccine, is likely to be highly sensitive to the estimate for the growth rate  
51 parameter.

52 The quantitative models used in epidemiology vary, from simple phenomenological  
53 models Lega and Brown (2016); Nouvellet et al. (2018) to complex agent-based simula-  
54 tions Ajelli et al. (2016); Merler et al. (2015).

55 Typically, the simpler phenomenological models — while able to produce exponen-  
56 tial or sub-exponential growth — lack the mechanistic underpinning to answer relevant  
57 question (e.g., what will be the effect of vaccinating 20% of the population?) and so  
58 have arguably limited application in outbreak investigations. At the other end of the  
59 complexity spectrum, agent-based models, with their high biological fidelity, allow for  
60 conceptually simple explorations of the impact of interventions. However, there is a  
61 cost: their complexity makes them difficult to reason about mathematically. They are  
62 also computationally intensive, making statistical analysis and so assessment of the early  
63 growth characteristics and potential impact of interventions, challenging.

64 Here, in the context of early outbreak investigation, we demonstrate how an in-  
65 homogeneous branching process formulation can overcome some of the challenges de-  
66 scribed above: the mismatch between exponential growth of transmission and obser-  
67 vations, and the difficulty of finding a model with a mechanistic basis which is still  
68 mathematically tractable. A temporal in-homogeneity in the branching process ensures  
69 the generation sizes grow algebraically (in expectation), instead of the typical geomet-  
70 ric/exponential growth. Branching processes can be viewed as either a tree, where it  
71 describes who-infected-whom, or as a time series to describe the total number of cases  
72 through time. As such, they are a good example of a multi-scale model. Unlike many  
73 of the complex mechanistic models, the simplicity of the branching process means it is  
74 possible to reason about them quantitatively and work with them computationally.

75 We explore the use and properties of this model from three perspectives. First, we  
76 use the branching process in a hierarchical model of transmission of Ebola virus in West  
77 Africa. Using publicly available data made from the World Health Organisation we  
78 demonstrate how the branching process can faithfully describe observed epidemics. Sec-  
79 ond, we fit the branching process to two different types of data: chains of infection and  
80 time series of cases of Ebola virus disease (EVD) from the West African Ebola epidemic  
81 (2014–2016). Our analysis demonstrates the model provides broadly consistent param-  
82 eter estimates using either data type, despite differences between the data sets. While the  
83 sub-exponential transmission of Ebola virus has been previously noted, Chowell et al.  
84 (2015), the branching process allows us to go further, supporting this claim through the  
85 interrogation of a new data set: a fully resolved infection tree inferred by Faye *et al* Faye  
86 et al. (2015). Third, to investigate the extent to which one might expect the previous  
87 result (i.e., obtaining similar estimates from each data type) to generalise, we performed  
88 a simulation study. The goal of this simulation study was not to investigate the utility  
89 of each data type for estimating the parameters *per se*, but to ask whether or not both  
90 data types, when derived from the same epidemic, produce concordant estimates.

## 91 **2. Methods — Model and analysis**

92 We derive the branching process in terms of a generic cumulative incidence function,  
93 i.e., a function describing the total number of cases that have occurred by a given time.  
94 We then consider the special case of a cumulative incidence function previously used to  
95 analyse time series of Ebola in West Africa Viboud et al. (2016). Finally, we construct  
96 a likelihood function for this model, both in terms of a time series of cases and for  
97 observations of the number of secondary cases generated by individuals.

### 98 **2.1. Construction of the in-homogeneous branching process model**

99 Let  $X_g^i$  denote the number of secondary infections due to individual  $i$  in generation  $g$   
100 and  $Z_g$  the total number of infectious individuals in that generation, i.e., the sum of the  
101  $X_{g-1}^i$ . We derive an in-homogeneous branching process where the *expected* generation  
102 sizes are  $f_g = \mathbb{E}Z_g$ .

103 Usually, the expected number of infectious individuals in a branching process grows  
104 exponentially/geometrically in the number of generations of transmission. For example,  
105 if  $\mathbb{E}X = \mu$  then  $\mathbb{E}Z_g = \mu^g$ . The branching process derived below has expected generation

**Table 1.** Notation used for the branching process.

| Variable                      | Symbol          | Variable type |
|-------------------------------|-----------------|---------------|
| Generation index              | $g$             | Constant      |
| Generation times              | $\Delta_g$      | Constant      |
| Expected cumulative size      | $C$             | Constant      |
| Expected generation size      | $f_g$           | Constant      |
| Expected secondary infections | $\mu_g$         | Constant      |
| Secondary infections          | $X_g$           | Random        |
| Generation size               | $Z_g$           | Random        |
| Growth rate                   | $r$             | Parameter     |
| Deceleration parameter        | $p$             | Parameter     |
| Dispersion parameter          | $k$             | Parameter     |
| Extinction                    | $\mathcal{E}_g$ | Random event  |

106 sizes (i.e., the  $\mathbb{E}Z_g$ ) which can follow any given monotonically increasing function. The  
 107 notation used in this construction is summarised in Table 1.

108 Let  $C(t)$  be the *expected* cumulative incidence by time  $t$ , i.e., the number of infections  
 109 we would expect to occur by time  $t$ . Evaluated at multiples of the serial interval,  $C$  yields  
 110 the generation sizes,  $f_g$  for  $g = 1, 2, \dots$

$$f_g = C(\Delta_g) - C(\Delta_{g-1}),$$

111 where  $\Delta_g$  is the time of the  $g$ th generation. The first value of this sequence is  $f_0 = Z_0$ ,  
 112 the number of infectious individuals in the first generation. Then, assuming the  $X_g^i$  are  
 113 independent with mean  $\mu_g = f_{g+1}/f_g$  we observe

$$\begin{aligned} \mathbb{E}Z_g &= \mathbb{E} \left[ \mathbb{E} \left[ \sum_i^{Z_{g-1}} X_{g-1}^i \middle| Z_{g-1} \right] \right] \\ &= \mathbb{E} [Z_{g-1}] \mu_{g-1}. \end{aligned}$$

114 The solution to this recurrence is

$$\mathbb{E}Z_g = Z_0 \prod_{i=0}^{g-1} \mu_i.$$

115 So  $\mathbb{E}Z_g = f_g$  from the definition of  $\mu_g$ .

116 In summary, by fixing the expected value of the offspring distribution (in terms of the  
 117 generation) we obtain a branching process which, on average, has an expected cumulative  
 118 incidence  $C$ . This construction enables us to capture the behaviour of a phenomenologi-  
 119 cal model which is known to fit observations better than exponential/geometric growth,  
 120 while maintaining a mechanistic foundation because it explicitly represents the individ-  
 121 uals in the population.

## 122 2.2. The cumulative incidence function

123 The construction above assumes a cumulative incidence function,  $C$ . We use the gener-  
 124 alized growth model Viboud et al. (2016) defined by

$$\frac{dC}{dt} = rC^p \quad \text{which has the solution} \quad C(t) = \left( \frac{r}{m}t + A \right)^m$$

125 where  $m = 1/(1 - p)$  and  $A = Z_0^{1/m}$ , with initial condition  $C(0) = Z_0$ . The growth  
126 rate,  $r$ , is as for standard exponential growth. The *generalisation* enters through the  
127 inclusion of the exponent  $p$ .

128 The parameter  $p$  is referred to as the *deceleration parameter*; it influences the dy-  
129 namics of transmission. For  $0 < p < 1$  the incidence interpolates through polynomials  
130 limiting to exponential growth as  $p \rightarrow 1$ . For  $p < 1$  there is a diminishing increase in  
131 the force of infection with each additional infection. When  $p = 0$  the force of infection  
132 is constant, for  $p = 1/2$  (when  $m = 2$ ) the incidence grows linearly (since the incidence  
133 is the derivative of the cumulative incidence by definition),  $p = 2/3$  provides quadratic  
134 growth and with  $p = 1$  we recover exponential growth in incidence.

135 Previous analyses suggest that the spread of diseases, such as Measles, HIV/AIDS,  
136 and FMD, are well explained by values of  $p < 1$ ; 0.51 (0.47, 0.55), 0.5 (0.47, 0.54), and  
137 0.42 (0.27, 0.58) respectively Viboud et al. (2016).

### 138 2.3. The offspring distribution

139 Since epidemiological count data is frequently over-dispersed (with respect to the Pois-  
140 son distribution) we use the negative binomial distribution for the offspring distribu-  
141 tion. Over-dispersion in count data can occur for many reasons Lindén and Mäntyniemi  
142 (2011), for case counts in an epidemic, *superspreaders* can play an important role Lloyd-  
143 Smith et al. (2005). We parameterise the negative binomial in terms of its mean,  $\mu$ , and  
144 a shape parameter,  $k$ , (a.k.a. the “dispersion parameter”). Under this parameterisation  
145 the variance,  $\sigma^2$ , grows quadratically in  $\mu$

$$\sigma^2 = \mu + \mu^2/k, \tag{1}$$

146 so as  $k \rightarrow \infty$  we recover the Poisson distribution. Since the mean value is determined  
147 by the cumulative incidence function ( $\mu = C$ ) this choice of offspring distribution only  
148 introduces a single additional parameter,  $k$ .

### 149 2.4. Likelihood function for time series and chains of infection

150 Early work by Wald in the 1940’s demonstrated the importance of survivorship bias.  
151 The importance of subtleties in the provenance of data, and how to account for this via  
152 conditioning is well understood in phylogenetics Stadler (2013) yet does not appear to  
153 have permeated to the same degree into the epidemiology literature (notable exceptions  
154 being the work of Mercer Mercer et al. (2011) and Rida Rida (1991)).

155 Popular estimators of the basic reproduction number,  $R_0$ , are biased towards *over-*  
156 *estimation* in the early stages of an epidemic, Mercer et al. (2011). We condition the  
157 process against extinction in the likelihood during fitting to mitigate this bias. In short  
158 — by virtue of being observed — the outbreak must have avoided stochastic extinction  
159 Rida (1991).

160 Realisations from the branching process are naturally viewed as a tree, with the edges  
161 indicating who infected whom. However, as the notation suggests, this process can also

## 6 Alexander E. Zarebski et al

162 be viewed as a sequence of generation sizes,  $Z_{0:g}$ . We refer to this representation of the  
 163 process as the *population view*. As we will see, the ability to represent a process as both  
 164 a tree and a time series is very useful when making use of multiple data types.

165 First we consider the likelihood function for the time series data, conditioned against  
 166 extinction over the observed generations. We extend the notation introduced in sec-  
 167 tion 2.1 to specify the (geographic) location (denoted by  $j$ ):  $X_{g,j}^i$  denotes the number of  
 168 infections caused by the  $i$ th member of the  $g$ th generation in location  $j$ , and  $Z_{g,j}$  denotes  
 169 the number of cases in generation  $g$  in location  $j$ . For ease of notation, we will often  
 170 drop the indices where they are clear by context.

171 By definition  $X_g$  has a negative binomial distribution with mean  $\mu_g$  and shape pa-  
 172 rameter  $k$ , so the moment-generating function (MGF) is

$$M_{X_g}(t) = \left( \frac{k}{k + \mu_g(1 - e^t)} \right)^k. \quad (2)$$

173 Since  $Z_g|Z_{g-1}$  is the sum of  $Z_{g-1}$  independent  $X_{g-1}$ , the MGF is given by the product

$$M_{Z_g|Z_{g-1}}(t) = M_{X_{g-1}}(t)^{Z_{g-1}} = \left( \frac{kZ_{g-1}}{kZ_{g-1} + \mu_{g-1}Z_{g-1}(1 - e^t)} \right)^{kZ_{g-1}} \quad (3)$$

174 and hence  $Z_g|Z_{g-1}$  is also negative binomial with mean  $\mu_{g-1}Z_{g-1}$  and shape param-  
 175 eter  $kZ_{g-1}$ . Since the generation sizes form a Markov chain and each location is assumed  
 176 to have an independent epidemic, the likelihood of all of the time series data is

$$\prod_j \prod_{l=1}^{N_j-1} \binom{Z_l + k_j Z_{l-1} - 1}{Z_l} \left( \frac{\mu_{l-1,j}}{\mu_{l-1,j} + k_j} \right)^{Z_l} \left( \frac{k_j}{\mu_{l-1,j} + k_j} \right)^{k_j Z_{l-1}} \quad (4)$$

177 where  $N_j$  denotes the number of generations that were observed in location  $j$ .

178 In order to condition the process against extinction during the observed generations  
 179 we use the probability that the process is extinct by the time of the last observation  
 180 at that location. To compute this probability, we consider the probability-generating  
 181 function (PGF) of the generation sizes,  $G_{Z_g}(t)$ . Since we are working with the PGF  
 182 (rather than the MGF) the sum of  $Z_{g-1}$  independent  $X_{g-1}$  leads to the composition

$$G_{Z_g}(t) = G_{Z_{g-1}}(G_{X_{g-1}}(t)). \quad (5)$$

183 Iterating this  $g$  times, and noting that  $G_{Z_0}(t) = t^{Z_0}$  leads to

$$G_{Z_g}(t) = G_{X_0}(G_{X_1}(\dots G_{X_{g-1}}(t)\dots))^{Z_0}, \quad (6)$$

184 where  $G_{X_g}(t) = (k/(k + \mu(1 - t)))^k$ . The composition produces a complicated ex-  
 185 pression, but for moderate  $g$  this is not an issue computationally. The probability of  
 186 extinction is the zero-th order coefficient of the PGF, hence the probability of extinction  
 187 by generation  $g$  is  $G_{Z_g}(0)$ .

188 Putting the previous results together, we obtain the conditional likelihood for the  
 189 observed times series:

$$\mathcal{L} = \prod_j \frac{\prod_{l=1}^{N_j-1} \binom{Z_{l,j} + k_j Z_{l-1,j} - 1}{Z_{l,j}} \left( \frac{\mu_{l-1,j}}{\mu_{l-1,j} + k_j} \right)^{Z_{l,j}} \left( \frac{k_j}{\mu_{l-1,j} + k_j} \right)^{k_j Z_{l-1,j}}}{1 - G_{Z_{N_j-1,j}}(0)}. \quad (7)$$

190 For secondary infections data, the probability of extinction conditional upon partial  
 191 observations is prohibitively expensive to evaluate since it requires integrating over all the  
 192 possible hidden infection trees. Subsequently, when working with secondary infections  
 193 data we do not condition the process against extinction. Instead we treat each count  
 194 of secondary infections as an independent sample from the offspring distribution. The  
 195 likelihood is

$$\mathcal{L} = \prod_{j,l,i} \binom{X_{l,j}^i + k_j - 1}{X_{l,j}^i} \left( \frac{\mu_{l,j}}{\mu_{l,j} + k_j} \right)^{X_{l,j}^i} \left( \frac{k_j}{\mu_{l,j} + k_j} \right)^{k_j} \quad (8)$$

196 We conclude this section with a few remarks on computation. When computing  
 197 with the expressions above for the likelihoods, the log-likelihood is used to avoid under-  
 198 flow/overflow issues. Moreover, the use of a probabilistic programming language (such  
 199 as Stan as used here) will handle this expression and its gradient in a numerically stable  
 200 way. Therefore in practice, beyond specifying the process as a graphical model, the only  
 201 requirement is to implement the computation of the extinction probability.

## 202 *2.5. Epidemiological data from the West African Ebola epidemic 2014–2016*

203 Data of cases of EVD in Guinea, Liberia and Sierra Leone from 2014–2016 were obtained  
 204 from the WHO World Health Organization (2018). We extracted confirmed cases from  
 205 the patient data and then selected the longest stretch of consecutive weeks (the temporal  
 206 resolution of the data) in which there was at least one confirmed case for each country.  
 207 This process was repeated to generate a time series for each of the countries considered.  
 208 The longest stretches occurred at the beginning of the epidemic for both Guinea and  
 209 Sierra Leone, while several isolated cases were removed from the start of the Liberian  
 210 time series. These time series were aggregated by fortnight as a proxy for generations of  
 211 transmission since the Ebola virus has an approximate 14 day generation time Chowell  
 212 and Nishiura (2014). The first 20% of cases were used in the analysis (as the  $Z_{0:G}$ ) to  
 213 represent transmission during the initial stage of the epidemic.

214 The WHO data also includes approximate locations for each case. Using this infor-  
 215 mation, we extracted another time series specific to Conakry, the capital city of Guinea.

216 Faye *et al* Faye et al. (2015) resolved an infection tree for cases from Conakry and  
 217 the towns of Boffa and Telimele resulting in the data shown in Figure 1. Of the 193  
 218 confirmed and probable cases reported from these locations, 152 were placed in the tree  
 219 with 106 of these from Conakry. To avoid the effects of re-importation we only used  
 220 cases from Conakry that were not re-introductions from Boffa or Telimele, leaving 98  
 221 cases in the tree.

222 In the case of Conakry, it is important to note that there are important differences  
 223 between the data sets. The time series is specific to confirmed cases while the tree  
 224 contains both confirmed and probable cases. And the number of cases in the time series  
 225 is far greater than the number in the infection tree.

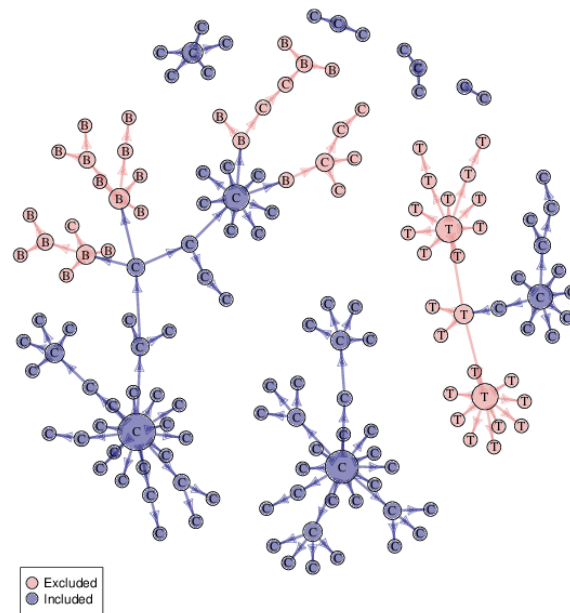

**Fig. 1.** The infection tree from Faye et al Faye et al. (2015). The colour of the nodes indicates whether the data were included in the analysis and the labels indicate where the infection occurred.



**Table 2.** Prior distributions used for the model parameters in the hierarchical model described in Section 2.6.

| Type           | Parameter  | Prior                          |
|----------------|------------|--------------------------------|
| Hyperparameter | $\alpha_p$ | Uniform(1, 5)                  |
|                | $\beta_p$  | Uniform(1, 5)                  |
|                | $\mu_r$    | Normal(0, 1)                   |
|                | $\mu_k$    | Normal(0, 1)                   |
| Parameter      | $p$        | Beta( $\alpha_p, \beta_p$ )    |
|                | $r$        | Lognormal( $\mu_r, \sigma^2$ ) |
|                | $k$        | Lognormal( $\mu_k, \sigma^2$ ) |
| Constant       | $\sigma^2$ | 1/6                            |

## 2.6. Inference method for the time series model

The confirmed cases of EVD in the three West African countries were modelled as time series of generation sizes using the population-level formulation of the branching process. We considered a hierarchical model in which the model parameters for each country are drawn from a common prior distribution which is also estimated. The prior distributions used for the parameters in this model are shown in Table 2. We computed the marginal prior distributions of the model parameters numerically to visually inspect the difference between the prior and posterior distributions.

The model was implemented in Stan Carpenter et al. (2017) and Hamiltonian Monte Carlo (HMC) was used to sample from the posterior distribution. Four HMC chains were run; the first 1000 samples of each chain were discarded as burn-in before a further 5000 samples were taken. Of the 5000, this was thinned by a factor of 5 to obtain the final 1000 samples for each chain. The chains appeared to have converged and mixed well: this was established via visual inspection and the  $\hat{R}$ -statistic ( $< 1.01$  for all variables). The effective sample size was appropriate given the dimensionality of the problem: for all variables in excess of 80% of the full number of iterations. Subsequently, the posterior samples were taken to provide a good representation of the posterior distribution.

## 2.7. Comparison of time series and chain of infection data from Conakry (Guinea)

As shown in Section 2.4, the branching process can be viewed at the individual or population scale. This prompts the question of whether data collected at each of these scales is equally informative about the parameters of the process, i.e., whether there is any advantage one over the other. We consider two data sets collected in Conakry (the capital city of Guinea) from the Ebola epidemic of 2014–2016: a time series of the number of confirmed cases each week (population scale data), and an infection tree describing who infected whom in a subset of cases (individual scale data). We fit the branching process to both data sets in order to determine whether they would lead to concordant parameter estimates. Note, similarity of the estimates was not guaranteed *a priori*, since while they are both observations of the same epidemic, the data sets consist of different cases. The time series has all the confirmed cases from Conakry, while the infection tree contains only a subset of the confirmed cases but it also contains suspected cases which were excluded from the time series Faye et al. (2015).

We used the population view of the branching process to model the time series of con-

**Table 3.** Prior distributions used for the model parameters in the comparison of the two data types from Conakry.

| Type      | Parameter  | Prior                     |
|-----------|------------|---------------------------|
| Parameter | $p$        | Beta(1.5, 1.5)            |
|           | $r$        | Lognormal(1, $\sigma^2$ ) |
|           | $k$        | Lognormal(1, $\sigma^2$ ) |
| Constant  | $\sigma^2$ | 1/6                       |

258 firmed cases from Conakry. For the secondary infections tree from Conakry (described  
259 in Section 2.5), we modelled the number of secondary infections from each individual  
260 as an independent sample from the offspring distribution. This takes the form of pairs,  
261  $(g, X_g^i)$ , one for each individual, where  $g$  is their infection generation (the node's depth  
262 in the tree) and  $X_g^i$  is their number of secondary infections (the out-degree of the node).

263 The prior distribution used is shown in Table 3. Fitting the model to each data set  
264 allows us to investigate whether these views of the same epidemic are consistent.

265 The models were implemented in Stan and Hamiltonian Monte Carlo (HMC) was  
266 used to sample from the posterior distribution. Four HMC chains were run; the first  
267 10000 samples of each chain were discarded as burn-in before a further 10000 samples  
268 were taken. Of the 10000, this was thinned by a factor of 10 to obtain the final 1000  
269 samples for each chain. The chains appeared to have converged and mixed well: this  
270 was established via visual inspection and the  $\hat{R}$ -statistic ( $< 1.01$  for all variables, with  
271 most  $< 1.001$ ). The effective sample size was sufficiently large, in excess of 90% of the  
272 true sample size for all variables. Subsequently, the posterior samples were taken to  
273 provide a good representation of the posterior distribution.

### 274 2.8. Simulation re-estimation study

275 We carried out a simulation study to investigate whether estimates derived from time  
276 series and secondary infections data are concordant and how this depends on the number  
277 of secondary infections observed. The goal of this study was to determine the regularity  
278 with which the estimates agree, rather than the accuracy with which they capture the  
279 dynamics of the epidemic. We simulated a Reed-Frost (RF) epidemic model 1000 times,  
280 recording who-infected-whom in each generation Brauer et al. (2008), as described in  
281 Supporting Materials. Note that the RF-model assumes a finite population while the  
282 branching process implicitly assumes an infinite population. Subsequently, in the RF-  
283 model the susceptible pool can be depleted during the epidemic – retarding transmission  
284 – eventually causing incidence to decline to zero. In addition to allowing us to investigate  
285 agreement between the estimates, fitting the branching process to realisations of the RF-  
286 model demonstrates how the model handles deviations from the assumptions used in its  
287 construction.

288 The models were implemented in Stan and L-BFGS was used to approximate the  
289 maximum a posteriori probability (MAP) for each of the simulations. Due to the large  
290 number of replications considered it was not feasible to check the output of each optimi-  
291 sation manually, instead it was left to the implementation of the optimisation algorithm  
292 to determine whether the computation had converged or whether a numerical issue had

*A sub-exponential branching process to study early epidemic dynamics with application to Ebola* 11

<sup>293</sup> been encountered (in which case the simulation and optimisation were repeated).

294 **3. Results**

295 **3.1. Hierarchical model fit of the in-homogeneous branching-process model to the**  
296 **EVD data**

297 Figure 2 shows the fit of the hierarchical model to time series of confirmed cases of EVD  
298 from Guinea, Liberia and Sierra Leone. The credible intervals on the figures show the  
299 uncertainty in the *expected incidence*, i.e., the 50% and 95% credible intervals for  $\mathbb{E}Z_g$ .

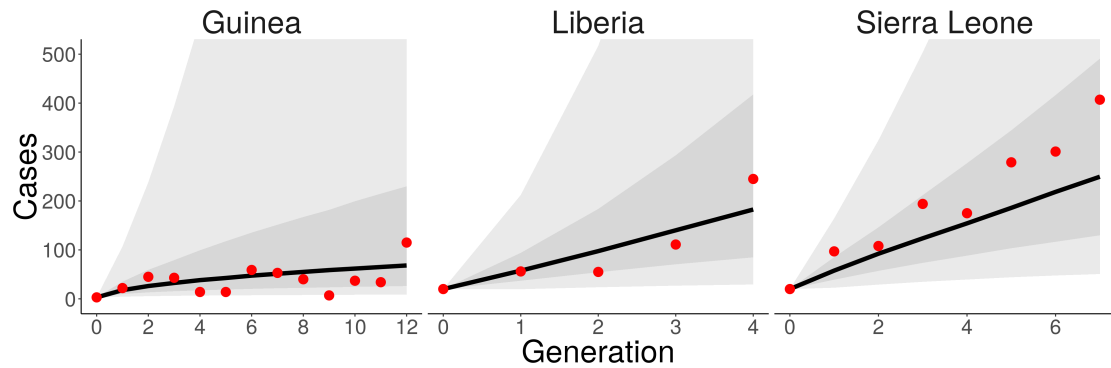

**Fig. 2.** The branching process fit to time series of confirmed cases of EVD from Guinea, Liberia and Sierra Leone. The expected generation sizes (the model fit) are shown as a solid line with the 50% and 95% credible interval on this estimate shown as a grey ribbon. The observed case counts are shown as red points.

300 Figure 3 shows the marginal posterior distributions of the *logarithm* of the growth  
301 rate, the deceleration parameter and the *logarithm* of the dispersion parameter respec-  
302 tively. Figure 3b shows the posterior mass for  $p$  has accumulated around 0.5 for all three  
303 countries; in the model, this corresponds to approximately linear growth in the incidence.  
304 Another way to view this would be that the cumulative incidence had quadratic growth.  
305 Recall from Equation (1) that the variance scales with the inverse of the dispersion pa-  
306 rameter. For each of the countries the dispersion parameter,  $k$ , has converged to small  
307 values indicating that the variance scales quickly with the mean incidence. This suggests  
308 stochasticity played an important role in the initial transmission in these countries.

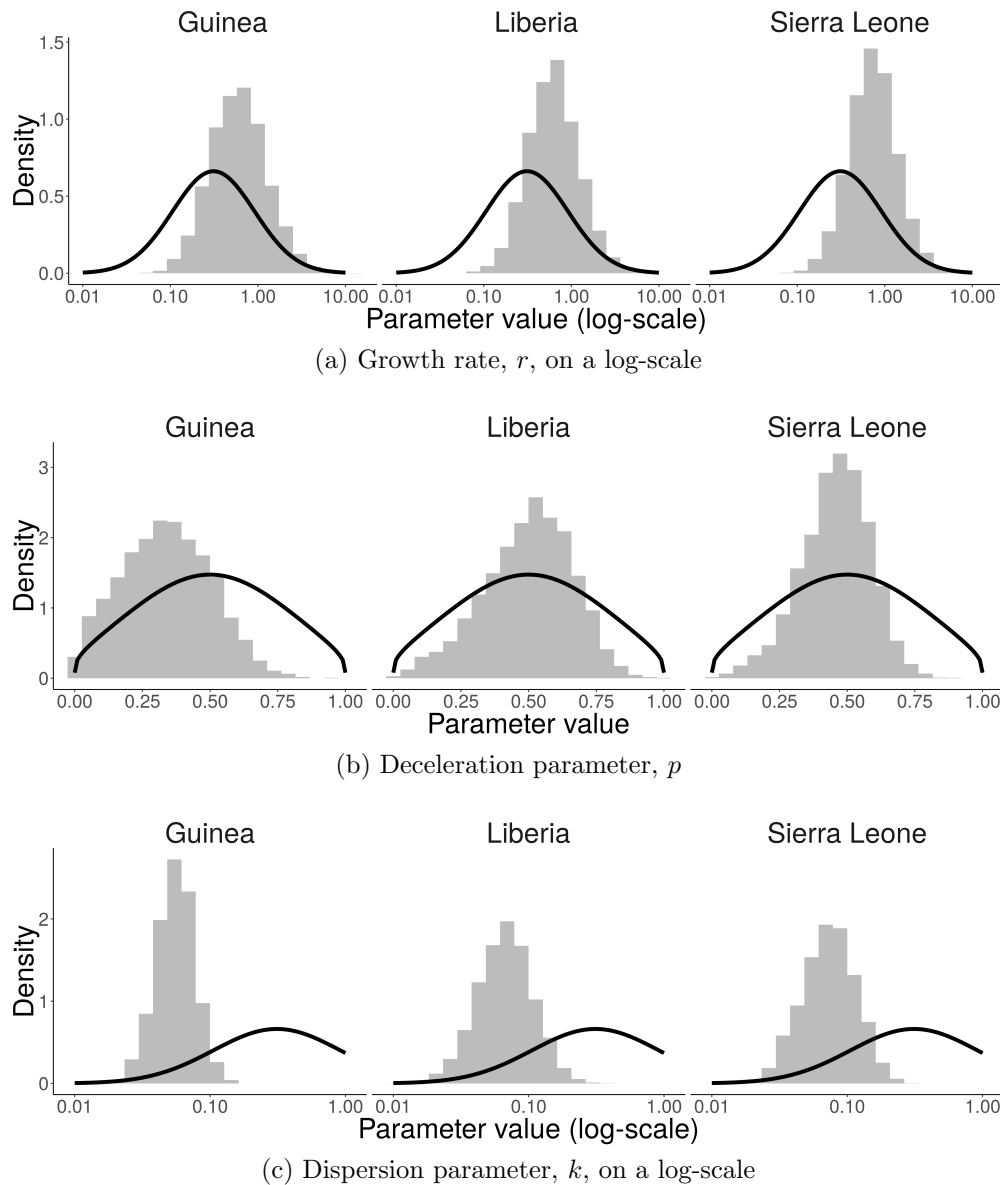

**Fig. 3.** Histograms of posterior samples under the hierarchical model for a.) Guinea, b.) Liberia and c.) Sierra Leone. The marginal prior distribution is included as a solid line to assess convergence.

### 3.2. Comparison of time series and infection chain data from Conakry (Guinea)

Figure 4 shows the marginal posterior distributions for the growth rate, deceleration and dispersion respectively, conditioning upon the time series and secondary infections data from Conakry. The posterior distributions differ from their prior, indicating information was extracted from the data. The parameter estimates inferred from each data set are

314 broadly consistent, suggesting, in this instance, that both data types provide a consistent  
315 representation of the dynamics. The time series data suggested a smaller growth rate  
316 (mean= 0.38, CI= 0.06 – 0.47) than the tree data (mean= 0.75, CI= 0.17 – 2.52).  
317 This trend is reversed for the deceleration parameter, which are 0.30, CI= 0.04 – 0.67  
318 for the time series and 0.13, CI= 0.01 – 0.36 for the tree data. Overall, the time series  
319 data suggests slower, but more rapidly accelerating growth than the secondary infections  
320 data. We consider potential causes for these differences in the Discussion.

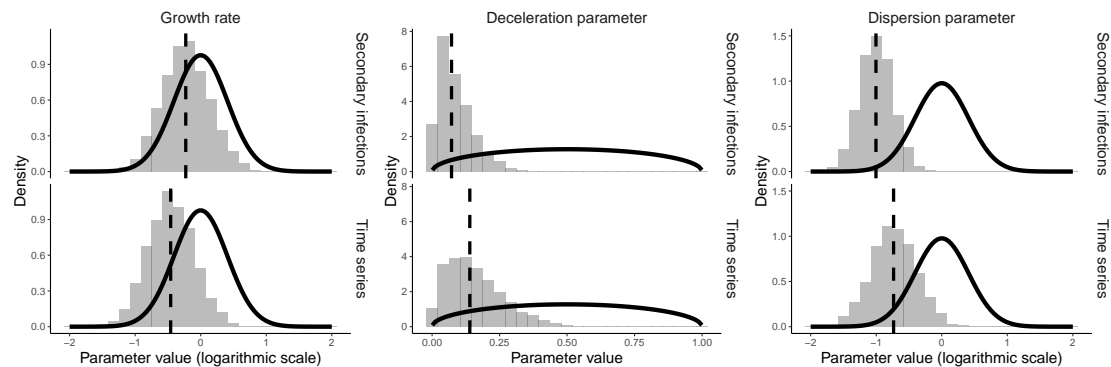

**Fig. 4.** Histograms representing the posterior distribution of the model parameters conditional upon the secondary infections data and the time series data from Conakry. The solid lines show the prior distribution for each of the parameters (obtained via numerical integration). The growth rate and dispersion parameters are shown on a log-scale.

### 321 3.3. Simulation re-estimation study

322 Figure 5 shows the simulations of the number of infectious individuals in each generation  
323 of the RF-model (Section 2.8). For most of these simulations, the incidence is still  
324 increasing during the first 7 generations suggesting the epidemic peak has not yet been  
325 reached for the majority of these simulated epidemics.

326 Figures 6, 7 and 8 shows the relationships between the maximum a posteriori proba-  
327 bility (MAP) estimates of the growth rate and the deceleration parameter (respectively)  
328 obtained using either data type. In the case of secondary infections data the number  
329 of infectious people to “contact trace” is a tuning parameter: a property of the actual  
330 observation process. For this study we inspected the number of secondary infections  
331 for three different intensities of observations, i.e., we recorded the number of secondary  
332 infections from 2, 5 and 10 individuals in each generation.

333 Considering the MAP conditional upon each data type, there is a strong correlation  
334 between the estimates obtained with each data type for both the growth rate and the  
335 deceleration parameter, and this correlation grows stronger as more secondary infections  
336 are observed. In the case of the deceleration parameter, once ten individuals have had  
337 their secondary infections observed both data types lead to essentially the same esti-  
338 mates. There is a clear bias and increased variability in the estimates derived from the  
339 secondary infections data for both the growth rate and the dispersion parameter. As

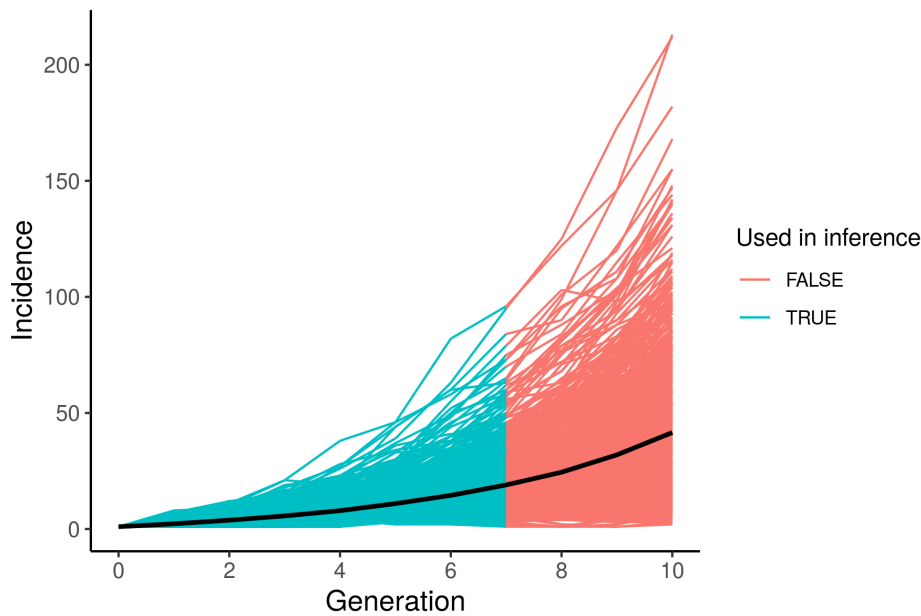

**Fig. 5.** Simulated time series from the Reed-Frost epidemic model and the mean of these time series. The blue portion of the time series was used in the simulation re-estimation study.

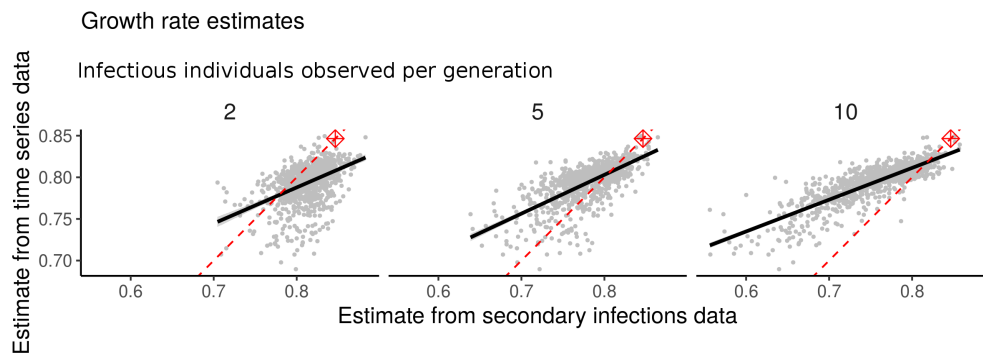

**Fig. 6.** A scatter plot of the maximum posterior probability estimate of the growth rate obtained from the time series data and the secondary infections data. There is a single point for each simulation, and the solid line shows a linear fit with a 95% confidence interval, the dashed line shows the parity line. Each facet shows the estimate conditional upon a different number of observations in each generation: 2, 5, or 10.

340 with any Bayesian analysis, it is important to understand the impact of the prior distri-  
341 bution; in the absence of any data, the MAP would be the mode of the prior distribution.

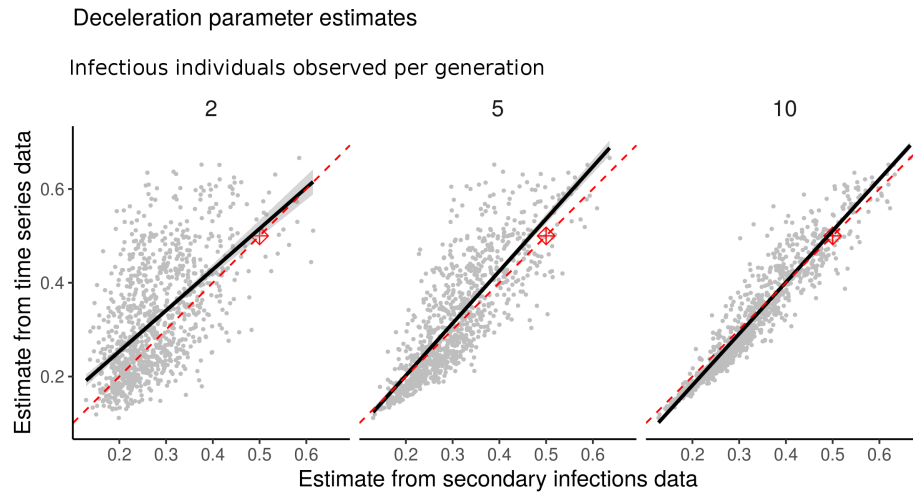

**Fig. 7.** A scatter plot of the maximum posterior probability estimate of the deceleration parameter obtained from the time series data and the secondary infections data. There is a single point for each simulation, and the solid line shows a linear fit with a 95% confidence interval, the dashed line shows the parity line. Each facet shows the estimate conditional upon a different number of observations in each generation: 2, 5, or 10.

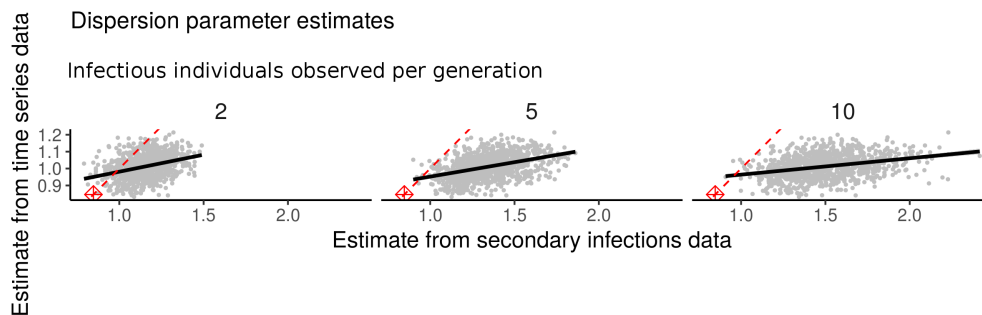

**Fig. 8.** A scatter plot of the maximum posterior probability estimate of the dispersion parameter obtained from the time series data and the secondary infections data. There is a single point for each simulation, and the solid line shows a linear fit with a 95% confidence interval, the dashed line shows the parity line. Each facet shows the estimate conditional upon a different number of observations in each generation: 2, 5, or 10.



342 In each case, there is a consistent shift in the MAP estimate away from the mode of the  
343 prior (as shown in the figures.)

## 344 **4. Interpretation**

### 345 *4.1. Sub-exponential growth of EVD in West Africa 2014–2016*

346 The analysis of the EVD time series from Guinea, Liberia and Sierra Leone demonstrates  
347 that the in-homogeneous branching process is capable of faithfully describing disease  
348 transmission at the population level. The posterior distribution of the deceleration  
349 parameter, which controls the scale of the growth, suggests that initially, the incidence  
350 grew approximately linearly (and the cumulative incidence quadratically). This differs  
351 from the results presented by Chowell *et al* Chowell et al. (2015), who observed that  
352 transmission at a sub-national level grew sub-exponential, but that at the national level  
353 it grew approximately exponentially. While it is tempting to attribute these differences  
354 to the differences in the modelling approach, the most likely explanation is the different  
355 pre-processing of the time series data. The previous analysis considered a portion of the  
356 time series from later in the epidemic, to mitigate the influence of stochastic effects. Since  
357 we have used a stochastic model in this analysis which can explain the initial fluctuations  
358 in incidence, we felt it was justified to use data from the start of the epidemic.

### 359 *4.2. Conakry: time series and chains of infection*

360 Using either time series data or secondary infections data from Conakry, Guinea leads  
361 to similar parameter estimates demonstrating that either data set could be used to  
362 characterise transmission. The time series estimates have a smaller growth rate and  
363 a larger deceleration parameter than those from the secondary infections data. The  
364 difference in the estimates could be partially attributed to the estimates trading off faster  
365 growth (i.e., higher growth rate) for less acceleration of growth (i.e., smaller deceleration  
366 parameter.) Since this trade-off should yield similar dynamics over short time spans it  
367 is unclear whether this difference would pose substantial issues to interpretation of the  
368 parameters.

369 In the case of this Ebola epidemic, the time series data was available long before the  
370 infection tree. However, obtaining comprehensive time series of disease is challenging,  
371 and it is interesting to know that there are alternative data sets which may be useful and  
372 already part of the data collected during intervention measures such as contact tracing.  
373 Moreover, our observations do not guarantee that we can rely on the agreement between  
374 the inference methods in general which is, in part, why we also carried out the simulation  
375 study.

### 376 *4.3. Simulation re-estimation study*

377 The simulations from the Reed-Frost (RF) model (shown in Figure 5) emphasise the  
378 variability between realisations of stochastic epidemic models, and consequently, the  
379 substantial role stochasticity plays during outbreaks. The parameter estimates derived  
380 from the time series data and secondary infections data generated by these epidemics

381 have a strong correlation which increases with the number of secondary infections ob-  
382 served. However, for the growth rate there is a clear trend that the secondary infections  
383 data tends to yield lower point estimates for the growth rate. A difference of this kind  
384 should not be ignored, however, given there will also be a level of uncertainty on these  
385 estimates, they will still give broadly consistent characterisations of the epidemic. The  
386 simulations used were generated with an RF model so there is not an obvious ground  
387 truth to compare these values to in order to further investigate which of the estimators  
388 is biased.

389 Together, this demonstrates that characterisations derived from each data type will  
390 be similar given a sufficient number of secondary observations, however (particularly in  
391 the case of the growth rate) there are systematic differences in the estimates that we  
392 were unable to explain. Conditioning the process against extinction in the case of the  
393 time series estimator, but not in the case of the secondary infections estimator, may be  
394 contributing to this systematic difference.

## 395 5. Discussion

396 We have presented an in-homogeneous branching process to model outbreaks of a trans-  
397 missible pathogen. The simplicity of the process means we can construct both a popu-  
398 lation and an individual scale view and subsequently assimilate data from either scale.

399 Our model admits a closed form for the likelihood for the time series and we have  
400 supplied an approximation for the likelihood of the secondary infections data. These  
401 closed forms make it feasible to conduct a Bayesian analysis and handle subtleties of  
402 the fitting process (in the case of the time series data), such as conditioning the process  
403 against extinction to account for the implicit observation bias. While we do not address  
404 unobserved cases in the secondary infections data, nor do we have a sophisticated method  
405 for aggregating cases into generations, our analysis of the Ebola data suggests these  
406 limitations do not cause substantial problems with the inference.

407 From that Ebola data, our analysis provides clear evidence for sub-exponential growth  
408 and a significant role for stochasticity in shaping the early epidemic dynamics. Our  
409 analysis extends work carried out during the 2014 Ebola epidemic by Chowell *et al*  
410 Chowell *et al.* (2015) and a comprehensive study of the dynamics of several pathogens'  
411 transmission Viboud *et al.* (2016). We used the same phenomenological model as the  
412 phenomenological backbone of the branching process. The resulting process has the  
413 same dynamics (on average) but with a mechanistic underpinning. This enables us to  
414 handle a wider range of data types, for example, the tree data from Faye *et al* Faye *et al.*  
415 (2015).

416 Assimilating secondary infection and time series data types simultaneously was be-  
417 yond the scope of the current work. Since the conditional distribution of Poisson variables  
418 given their sum is multinomial, it would be feasible to perform simultaneous assimilation  
419 with a Poisson offspring distribution. However, the matter becomes more complicated  
420 when using a negative binomial distribution, as we use here due to the over-dispersion  
421 so common in epidemiological transmission data.

422 From the simulation study, we have identified a systematic difference in the estimators  
423 for model parameters based on the two data types. We suspect this stems from the

424 differing treatment of extinction for the two analyses. A more in-depth study of this was  
425 beyond the scope of the current work.

426 Lags in time series data cause substantial problems when forecasting incidence Moss  
427 et al. (2018). “First Few Hundred” (FF100) studies collect the same type of data as con-  
428 tact tracing and are heralded as a way to rapidly provide a characterisation of transmis-  
429 sion dynamics Black et al. (2017). While for the 2014 Ebola epidemic the time series was  
430 available before the secondary infections tree, there does not seem to be anything intrinsic  
431 to the data collection process that precludes this being reversed. In fact, it seems plausi-  
432 ble that in active surveillance programs and with increased use of sequencing, secondary  
433 infections data may become available before time series, and so the method we present  
434 here may have important application in future real-time outbreak analyses. Of course,  
435 there are ethical, procedural, and technical challenges that are introduced by collecting,  
436 analysing and storing data such as this since by its very nature it resolves more of the  
437 epidemic. The source code to carry out the analyses reported in this paper are publically  
438 available under an open-source licence at <https://bitbucket.org/azarebski/subexp>.

439 Most pertinent to improving the value of our approach is establishing how to han-  
440 dle incomplete secondary infections data. We investigated the consequences of partial  
441 observation of the infectious population, but with perfect ascertainment of the number  
442 of infections due to each individual. A natural extension then is to consider partial  
443 observation of the population with imperfect resolution, i.e., observe a random subset of  
444 the infectious population and observe only a subset of their infections. This additional  
445 way in which data can be missing is particularly important in airborne disease, such as  
446 influenza, where the source of an infection may be harder to ascertain. If the goal is  
447 to characterise the transmission dynamics of a pathogen for which sub-clinical cases are  
448 rare, such as Ebola virus disease, then the assumption of complete observation among  
449 those observed does not seem unreasonable. As sequencing data becomes more readily  
450 available we will have improved capability to determine who-infected-whom and models  
451 such as the one presented in this work are poised to take advantage of this additional  
452 information.

## 453 **6. Acknowledgements**

454 The authors acknowledge the helpful discussions with Peter Dawson, Gerardo Chowell  
455 and Peter Taylor during the conceptualisation of this work. AEZ was supported by an  
456 Australian Government Research Training Program scholarship while undertaking his  
457 PhD, with further support from an Australian Government Defence Science Technology  
458 Group scholarship. RM was supported by an Australian Government Defence Science  
459 Technology Group research agreement.

## 460 **References**

461 Ajelli, M., S. Merler, L. Fumanelli, A. Pastore y Piontti, N. E. Dean, I. M. Longini,  
462 M. E. Halloran, and A. Vespignani (2016, Sep). Spatiotemporal dynamics of the  
463 Ebola epidemic in Guinea and implications for vaccination and disease elimination: a  
464 computational modeling analysis. *BMC Medicine* 14(1), 130.

- 465 Black, A. J., N. Geard, J. M. McCaw, J. McVernon, and J. V. Ross (2017). Charac-  
466 terising pandemic severity and transmissibility from data collected during first few  
467 hundred studies. *Epidemics* 19, 61 – 73.
- 468 Brauer, F., P. van den Driessche, and J. Wu (2008). *Mathematical Epidemiology*.  
469 Springer, Berlin, Heidelberg.
- 470 Carpenter, B., A. Gelman, M. D. Hoffman, D. Lee, B. Goodrich, M. Betancourt,  
471 M. Brubaker, J. Guo, P. Li, and A. Riddell (2017). Stan: A Probabilistic Programming  
472 Language. *Journal of Statistical Software* 76(1).
- 473 Chowell, G. and H. Nishiura (2014, Oct). Transmission dynamics and control of Ebola  
474 virus disease (EVD): a review. *BMC Medicine* 12(1), 196.
- 475 Chowell, G., C. Viboud, J. M. Hyman, and L. Simonsen (2015). The Western Africa  
476 Ebola Virus Disease Epidemic Exhibits Both Global Exponential and Local Polynomial  
477 Growth Rates. *PLOS Currents* 7.
- 478 Faye, O., P.-Y. Boëlle, E. Heleze, O. Faye, C. Loucoubar, N. Magassouba, B. Soropogui,  
479 S. Keita, T. Gakou, E. H. I. Bah, L. Koivogui, A. A. Sall, and S. Cauchemez (2015,  
480 Mar). Chains of transmission and control of Ebola virus disease in Conakry, Guinea,  
481 in 2014: an observational study. *The Lancet Infectious Diseases* 15(3), 320–326.
- 482 Lega, J. and H. E. Brown (2016). Data-driven outbreak forecasting with a simple non-  
483 linear growth model. *Epidemics* 17, 19 – 26.
- 484 Lindén, A. and S. Mäntyniemi (2011). Using the negative binomial distribution to model  
485 overdispersion in ecological count data. *Ecology* 92(7), 1414–1421.
- 486 Lloyd-Smith, J. O., S. J. Schreiber, P. E. Kopp, and W. M. Getz (2005). Superspreading  
487 and the effect of individual variation on disease emergence. *Nature* 438(7066), 355.
- 488 Mercer, G. N., K. Glass, and N. G. Becker (2011). Effective reproduction numbers are  
489 commonly overestimated early in a disease outbreak. *Statistics in Medicine* 30(9),  
490 984–994.
- 491 Merler, S., M. Ajelli, L. Fumanelli, M. F. Gomes, A. P. y Piontti, L. Rossi, D. L.  
492 Chao, I. M. Longini Jr, M. E. Halloran, and A. Vespignani (2015). Spatiotemporal  
493 spread of the 2014 outbreak of Ebola virus disease in Liberia and the effectiveness of  
494 non-pharmaceutical interventions: a computational modelling analysis. *The Lancet*  
495 *Infectious Diseases* 15(2), 204–211.
- 496 Moss, R., J. E. Fielding, L. J. Franklin, N. Stephens, J. McVernon, P. Dawson, and J. M.  
497 McCaw (2018). Epidemic forecasts as a tool for public health: interpretation and (re)  
498 calibration. *Australian and New Zealand Journal of Public Health* 42(1), 69–76.
- 499 Nouvellet, P., A. Cori, T. Garske, I. M. Blake, I. Dorigatti, W. Hinsley, T. Jombart,  
500 H. L. Mills, G. Nedjati-Gilani, M. D. V. Kerkhove, C. Fraser, C. A. Donnelly, N. M.  
501 Ferguson, and S. Riley (2018). A simple approach to measure transmissibility and  
502 forecast incidence. *Epidemics* 22, 29 – 35. The RAPIDD Ebola Forecasting Challenge.

*A sub-exponential branching process to study early epidemic dynamics with application to Ebola* 21

- 503 Rida, W. N. (1991). Asymptotic Properties of Some Estimators for the Infection Rate  
504 in the General Stochastic Epidemic Model. *Journal of the Royal Statistical Society.*  
505 *Series B (Methodological)* 53(1), 269–283.
- 506 Stadler, T. (2013). How Can We Improve Accuracy of Macroevolutionary Rate Esti-  
507 mates? *Systematic Biology* 62(2), 321–329.
- 508 Viboud, C., L. Simonsen, and G. Chowell (2016). A generalized-growth model to charac-  
509 terize the early ascending phase of infectious disease outbreaks. *Epidemics* 15, 27–37.
- 510 World Health Organization (2018). Ebola data and statistics. [http://apps.who.int/  
511 gho/data/node.ebola-sitrep.quick-downloads?lang=en](http://apps.who.int/gho/data/node.ebola-sitrep.quick-downloads?lang=en). Accessed: 2018-01-15.
